# Supplementary material
Source: Springer Nature journal article supplement (https://www.springermedizin.de/resource/supplementary/13037_2011_102_MOESM1_ESM.pdf/9659322)
Supplement: MOESM1 [file 9659322]

Patient - Surgeon

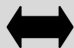

Project - Researcher

Case History

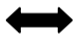

Introduction

Working diagnosis

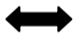

Hypothesis

Diagnostic investigation

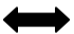

Material und Methodology

Differential diagnosis

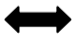

Discussion

Diagnosis

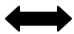

Conclusion

Therapy

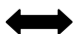

Transfer
